# Supplementary material for: Morphological and proteomic analysis of biofilms from the Antarctic archaeon, Halorubrum lacusprofundi
Source: PubMed Central journal article supplement (PMC5118699; doi:10.1038/srep37454), 2016-11-22
Supplement: srep37454-s1.pdf [file srep37454-s1.pdf]

1 **Morphological and proteomic analysis of biofilms from the Antarctic**  
2 **archaeon, *Halorubrum lacusprofundi***

3

4 **Liao Y, Williams TJ, Ye J, Charlesworth J, Burns BP, Poljak A, Raftery MJ and**  
5 **Cavicchioli R**

6

7

8

### **Supplementary Information**

9 **Methods**

10 **Reference**

11 **Figure S1-S6**

12 **Table S1-S10 (note Table S2-S10 are provided as separate excel files)**

13 **Methods**

14 **Preparing samples for iTRAQ labeling.** *Hrr. lacusprofundi* ACAM34 cells were  
15 grown in DBCM2 basal salt medium<sup>1</sup> supplemented with 10 mM pyruvate and either  
16 5 mM NH<sub>4</sub>Cl (medium A) or 5 mM urea (medium B), plus peptone (0.025 % w/v)  
17 and yeast extract (0.005% w/v). *Hrr. lacusprofundi* was inoculated 1:100 from  
18 cultures grown under the same conditions in 50 mL medium in 250 mL flasks at 30°C  
19 and 120 rpm. When cells reached mid-logarithmic phase (4 d), half of the culture  
20 volume was removed and cells harvested to obtain a whole cell pellet and an  
21 extracellular fraction (supernatant). The remaining half of the culture was grown until  
22 14 d, and cells were harvested and processed as for log phase cells. Cells were  
23 pelleted by centrifugation for 20 min at 4,500 x g. The supernatant was obtained by  
24 filtering cells through a 15 mL Amicon centrifugal concentration unit (Millipore,  
25 Billerica, MA) with a 3 kDa cutoff by centrifugation at 5000 × g, with five subsequent  
26 buffer exchanges with 25 mM NaHCO<sub>3</sub>. The resulting concentrate (~ 500 µL)  
27 constituted the supernatant fraction, and was stored at -80°C until needed. Proteins  
28 were extracted by vortexing cell pellets in 5 mL disruption buffer (50 mM Tris-HCl  
29 pH 7.2; 2 mM EDTA, pH 7.2; 0.4 mM phenylmethanesulphonylfluoride) and  
30 ultrasonically disrupting cells on ice using a Branson Sonifier 250 (Branson  
31 Ultrasonics, Danbury, CT) with the probe output set at 20% amplitude for five periods  
32 of 40 s (pulse cycle of 0.5 s on and 0.5 s off) with a 40 s cooling on ice between  
33 periods of sonication to prevent sample heating which might denature proteins and  
34 create solubility problems. The resulting solution was retained and filtered, as  
35 described above for the supernatant fraction, to generate the whole cell extract  
36 fraction. The protein concentration of each sample in whole cell extracts and  
37 supernatant fractions by performing a bicinchoninic acid assay at 562 nm with a  
38 microplate reader using a Thermo Scientific Pierce BCA Protein Assay Kit (Product  
39 No. 23225) and following manufacturer's instructions. Protein quality was assessed  
40 using polyacrylamide-gel electrophoresis (NuPAGE 4-12% Bis-Tris).

41

42 **iTRAQ labelling.** Prior to iTRAQ labelling, protein samples were reduced, alkylated  
43 and digested with trypsin overnight. Protein from whole cell extracts or supernatant  
44 fractions (100 µg) was reduced with 2 µL tris-(2-carboxyethyl) phosphine and  
45 incubated at 60°C for 60 min, and proteins were then alkylated with 1 µL

46 iodoacetamide (37 mg mL<sup>-1</sup>) for 10 min at room temperature and then digested with 2  
47 µg trypsin per 100 µg total protein overnight (16 – 18 h) at 37°C. Proteins were  
48 labelled with iTRAQ reporter labels according to the manufacturer’s instructions  
49 (Sciex, Framingham, MA, USA), and the pH adjusted to 8-9 by adding 2.5 - 4 µL of  
50 500 mM Na<sub>2</sub>CO<sub>3</sub>, followed by incubation for 2 h at room temperature. iTRAQ  
51 labelled peptides were combined and then diluted 10-fold with cation exchange “load  
52 buffer” (10 mM KH<sub>2</sub>PO<sub>4</sub> in 25% acetonitrile, at pH 3.0) to reduce the concentration of  
53 buffer salts and organics, and the pH adjusted to 2.5 with 100% acetic acid. The  
54 sample mixture was passed slowly through a cation exchange cartridge (AB Sciex,  
55 Foster City, CA), and the cartridge was washed with “load buffer” to remove excess  
56 reagents (e.g. iTRAQ labels, trypsin, SDS, solvents). The peptides bonding to the  
57 cartridge were eluted with 500 µL of cation exchange “elute” buffer (10 mM  
58 potassium phosphate KH<sub>2</sub>PO<sub>4</sub> in 25% acetonitrile and 350 mM KCl, pH 3.0). The  
59 eluent was dried in a speedvac and then resuspended in 500 µL 0.2%  
60 heptafluorobutyric acid. A C18 macrotrap (Michrom Bioresources, Auburn, AL), was  
61 primed with 1 mL 100% CH<sub>3</sub>CN, then 1 mL 50% CH<sub>3</sub>CN/0.1% formic, and finally  
62 equilibrated with 1 mL 0.2% heptafluorobutyric acid. The 500 µL of sample eluent  
63 from the previous step was then loaded into the primed C18 cartridge, and washed  
64 with 1 mL 0.2% heptafluorobutyric acid. In order to maximize recovery, the above  
65 C18 flow through was passed through an Oasis HLB cartridge (Waters, Milford, MA)  
66 to capture any peptides not bound to the macrotrap. The Oasis HLB cartridge was  
67 prepared by washing with 3 x 1 mL 100% CH<sub>3</sub>CN, then 3 x 1mL 50% CH<sub>3</sub>CN/0.1%  
68 formic, followed by 3 x 1 mL 0.2% heptafluorobutyric acid. The peptides bound to  
69 the C18 cartridge were eluted with 500 µL 50% CH<sub>3</sub>CN/0.1% formic, followed by  
70 200 µL 100% CH<sub>3</sub>CN. The peptide eluents (C18 and Oasis HLB) were pooled and  
71 then dried in a speedvac. The pellets were resuspended in 200 µL of 0.2%  
72 heptafluorobutyric acid /0.1% formic acid, and used for LCMSMS analysis.

73

74 **LC Packings capillary HPLC system.** Appropriate dilutions of peptide suspensions  
75 (~ 4 µg) were analysed using a nanoLC system consisting of a Dionex UltiMate 3000  
76 RSLCnano pump system, Switchos valve unit and Famos autosampler. Samples were  
77 injected onto a C18 precolumn cartridge (Acclaim PepMap 100, 5 mm 100 Å,  
78 Thermo Scientific Dionex, Waltham, USA), washed (10 min), and then switched

79 inline to a capillary column (10 cm, C18 reverse phase packing material;  
80 Reprosil-Pur, 1.9  $\mu$ , 200 Å, Dr. Maisch GmbH, Ammerbuch-Entringen, Germany).  
81 Elution was achieved using a 240 min gradient of buffer A (H<sub>2</sub>O:CH<sub>3</sub>CN of 98:2  
82 containing 0.1% formic acid) to buffer B (H<sub>2</sub>O:CH<sub>3</sub>CN of 20:80 containing 0.1%  
83 formic acid) at 200 nL min<sup>-1</sup>.

84

85 **Mass spectrometry.** Using a TripleTOF 5600+ hybrid tandem mass spectrometer  
86 (ABSciex, Foster City, USA), ion spray voltage (2300 V) was applied to the  
87 Nanospray® III ion source near the column outlet, with fixed angle spraying (25°),  
88 and the column tip positioned ~1 cm from the TripleTOF 5600+ source orifice. The  
89 interface heater temperature was set to 150°C, positive ion electrospray ionization  
90 was used, and the TripleTOF 5600+ operated in information-dependent acquisition  
91 mode. A time of flight MS survey scan was acquired ( $m/z$  400-1600, 0.4 s) and up to  
92 10 multiply charged ions ( $m/z$  400-1250, counts > 400, charge state 2<sup>+</sup>, 3<sup>+</sup>, 4<sup>+</sup> or 5<sup>+</sup>)  
93 sequentially selected by Q1 for MS-MS analysis. Nitrogen collision gas was used and  
94 optimum collision energy automatically chosen (based on charge state and mass).  
95 Tandem mass spectra were accumulated for 0.3 s ( $m/z$  100-1800).

96

97 **Data analysis.** The parameters for Protein pilot software 4.5 were set as follows:  
98 sample type-iTRAQ 8plex (peptide labeled); Cys alkylation-iodoacetamide;  
99 digestion-trypsin; Instrument-TripleTOF 5600; special Factors-none; species-none; ID  
100 focus-biological modifications; search effort-thorough ID; detected Protein  
101 Threshold-0.05 (10.0%); quantitate and bias correction were applied. False Discovery  
102 Rate Analysis was performed. All protein identifications were based on the criteria of  
103 False Discovery Rate < 1%. Proteins identified with confidence  $\geq$  95% (Unused score  
104  $\geq$  1.3) were taken into account, while the proteins identified without iTRAQ reporter  
105 ion ratio data or  $p$  value were filtered out.

106

107 **Quantification of biofilm biomass.** To quantify biofilm biomass, biofilms attached  
108 to the inner surfaces of flasks were scraped into solution, and the solution was passed  
109 through Whatman no. 54 filter paper using vacuum filtration to collect total biofilm  
110 on the filter paper and planktonic cells in the filtrate. The biomass captured on filters  
111 was washed 3 times with a 30% salt water solution<sup>1</sup>. Filter papers were placed in

112 tubes in 25 mL of 30% salt water solution at 30°C and shaken at 120 rpm overnight to  
113 release cells into the liquid phase, filters removed, cells pelleted by centrifugation for  
114 5 min at 4,500 x g and cells resuspended in 2 ml 30% salt water solution and stored at  
115 room temperature. Prior to analysis, cells were pelleted by centrifugation, and  
116 supernatant solution removed as described above. Pellets were air dried and stained  
117 with 2 mL 0.1% crystal violet (in 30% salt water solution) for 1-2 h at room  
118 temperature. A small amount of cell suspension (1 µL) was examined by light  
119 microscopy every 20 min to assess color development. When all the cell pellets turned  
120 purple, the excess crystal violet solution was removed by centrifugation at 10,000 x g  
121 for 2 min, and the cell pellet washed with 3 x 30% salt water solution and then air  
122 dried. The dye bound to the cells was resolubilized with 1 mL of 33% glacial acetic  
123 acid and the cells kept at room temperature without shaking until the cell pellets  
124 changed to their original pink color (1-2 h). The concentration of crystal violet was  
125 determined by measuring the optical density of the destaining solution at 600 nm. To  
126 quantify biofilm biomass using the bicinchoninic acid assay, total protein was  
127 extracted by sonication and protein concentration measured as described above  
128 (**iTRAQ labeling**). Acridine orange (Ex 505 nm/Em 525 nm) staining of extracellular  
129 and intracellular DNA present in biofilms was performed by suspending biofilms in 2  
130 mL 30% salt water solution and transferring the suspension to 24-well microtitre  
131 plates supplemented with acridine orange (final concentration of 10 µg mL<sup>-1</sup>) and  
132 incubating the plates for 15 min in the dark at room temperature. The fluorescence  
133 signal was quantified using a Fujifilm FLA-5000 Fluorescent Image Analyzer  
134 (Fujifilm, Tokyo, Japan) with a 473 nm excitation laser and Fujifilm LPB filter using  
135 Fujifilm Science Lab Image Gauge Ver 4.0 software. Salt water solution (30%) was  
136 used as a blank and assessments were performed in triplicate, and standard error  
137 calculated.

138

## 139 **References**

- 140 1. Dyall-Smith, M. *The Halohandbook: Protocols for Halobacterial Genetics*. (2009)  
141 [http://www.haloarchaea.com/resources/handbook/Halohandbook\\_2009\\_v7.1.pdf](http://www.haloarchaea.com/resources/handbook/Halohandbook_2009_v7.1.pdf).
- 142 2. Dehal, P.S., *et al.* MicrobesOnline: an integrated portal for comparative and  
143 functional genomics. *Nucleic Acids Res.* **38**, 396–400 (2010).

- 144 3. Narasimhan, G. *et al.* Mining protein sequences for motifs. *J. Comput. Biol.* **9**,  
145 707–720 (2002).

**Figure S1. Growth of *Hrr. lacusprofundi* in medium containing or lacking ammonium, with different concentrations of yeast extract and peptone.** A: Growth of *Hrr. lacusprofundi* in 25 mL medium B (lacking NH<sub>4</sub>Cl) in 100 mL flasks at 30°C. B: Growth of *Hrr. lacusprofundi* in 25 mL medium A (containing 5 mM NH<sub>4</sub>Cl) in 100 mL flasks at 30°C. A and B: The growth media contained different concentrations of yeast extract (YE) and peptone (P). 1 x: 5 x 10<sup>-3</sup>% YE and 2.5 x 10<sup>-2</sup>% P (purple); 1/10 x: 5 x 10<sup>-4</sup>% YE and 2.5 x 10<sup>-3</sup>% P (green); 1/100 x: 5 x 10<sup>-5</sup>% YE and 2.5 x 10<sup>-4</sup>% P (red); 0 x: no YE or P (blue). Images showing the cultures in their flasks at the end of the incubation periods are shown under the scatter plots.

Figure S1

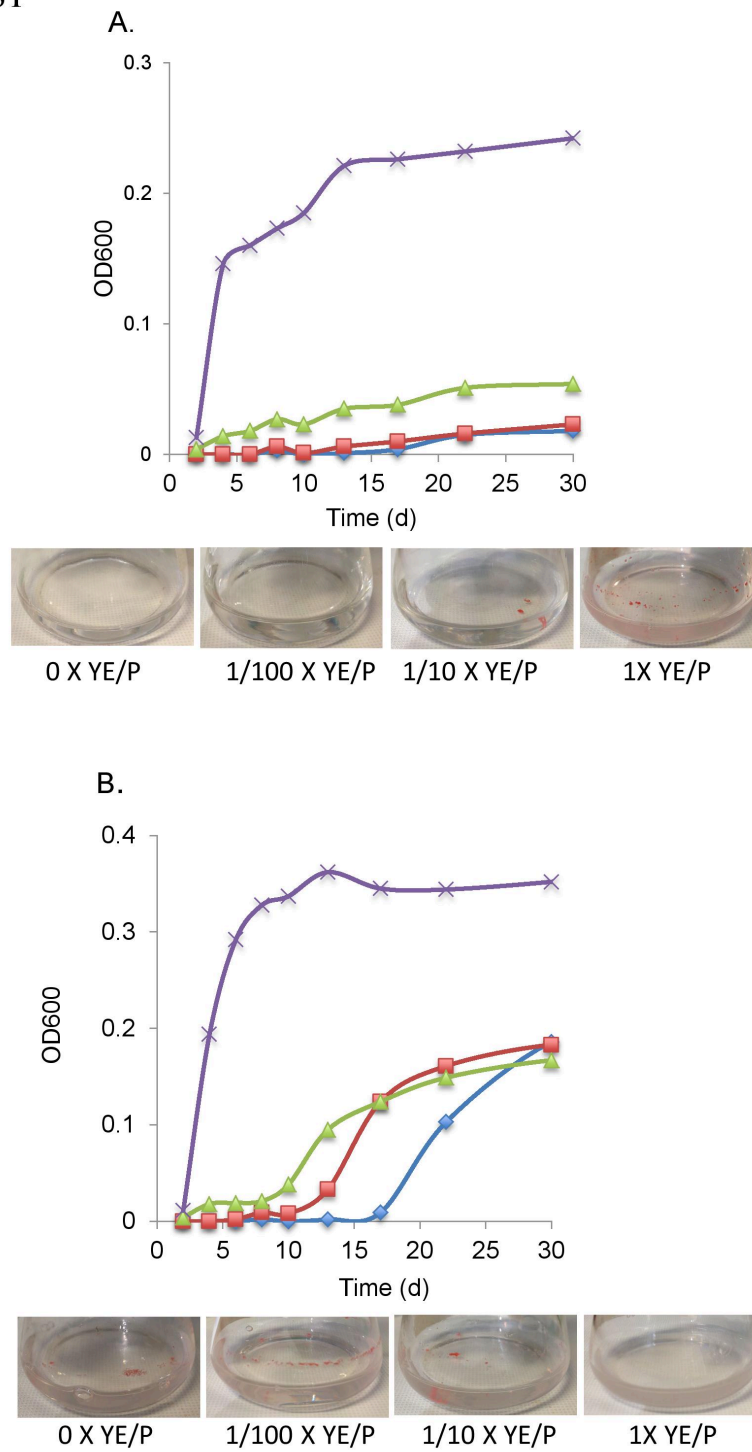



**Figure S2. Retention of DNase I activity in incubated cultures.** Aliquots (100  $\mu\text{L}$ ) were withdrawn daily for 14 d from DNase I-treated cultures ( $1 \text{ mg mL}^{-1}$ ) and a DNase I-treated uninoculated control (medium B), and incubated with 500  $\mu\text{g}$  *Hrr. lacusprofundi* genomic DNA at  $37^\circ\text{C}$  for 1 h, and the sample analysed by agarose (1%) gel electrophoresis. Lane M: 1 kb DNA ladder; Lane 1: 500  $\mu\text{g}$  haloarchaea genomic DNA in pure water; Lane 2: 500  $\mu\text{g}$  haloarchaea genomic DNA in uninoculated medium B; Lane B: DNase I-treated uninoculated medium B + 500  $\mu\text{g}$  genomic DNA; Lane C: DNase I-treated cultures + 500  $\mu\text{g}$  genomic DNA; Lane W: DNase I-treated pure water + 500  $\mu\text{g}$  genomic DNA.

Figure S2

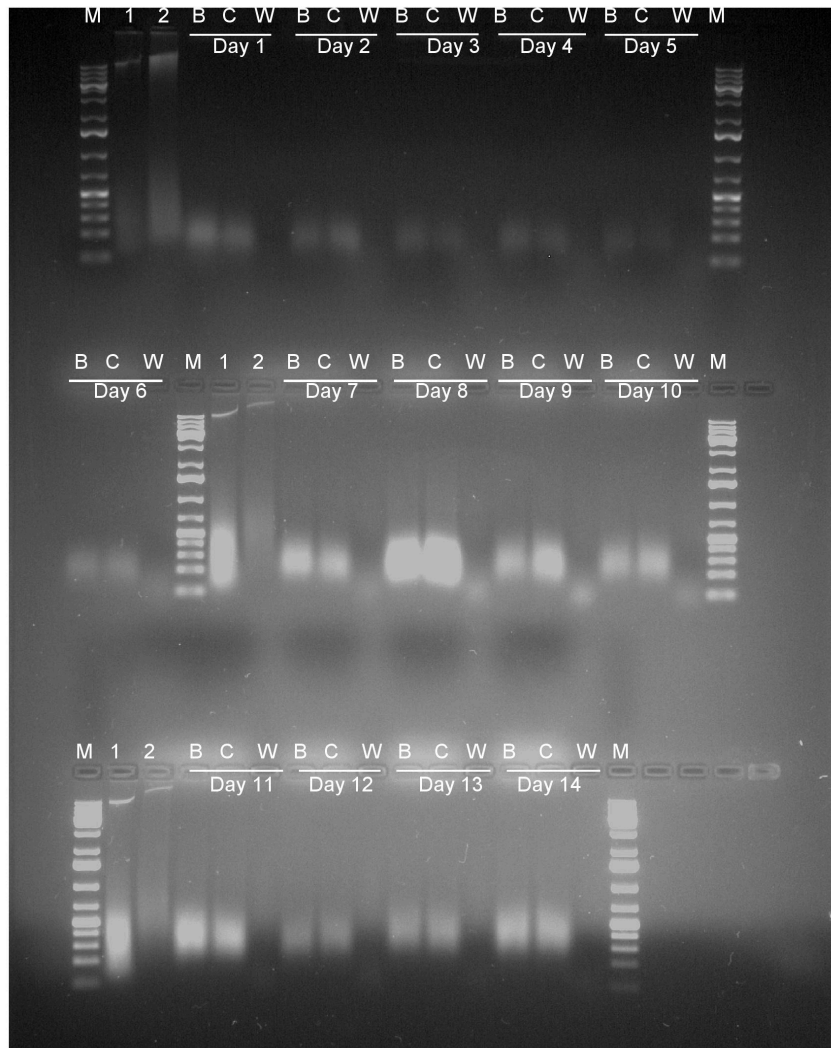

**Figure S3. Growth of *Hrr. lacsurpfundi* in medium lacking ammonium with bovine serum albumin treatment.** Growth of *Hrr. lacusprofundi* in 50 mL medium B in 250 mL flasks with the addition of 1 mg mL<sup>-1</sup> bovine serum albumin. Error bars represent the standard error of the mean for three experiments. A: OD<sub>600</sub> for cultures without bovine serum albumin (open squares); cultures with 1 mg mL<sup>-1</sup> bovine serum albumin (full squares); uninoculated medium without bovine serum albumin (open triangles); uninoculated medium with 1 mg mL<sup>-1</sup> bovine serum albumin (full triangles). B: Cell viability (colony forming units) for cultures without bovine serum albumin (open squares); cultures with 1 mg mL<sup>-1</sup> bovine serum albumin (full squares); For uninoculated medium with 1 mg mL<sup>-1</sup> bovine serum albumin, the number of cells per mL was below the detection limit (100 cells mL<sup>-1</sup>) (data not shown).

Figure S3

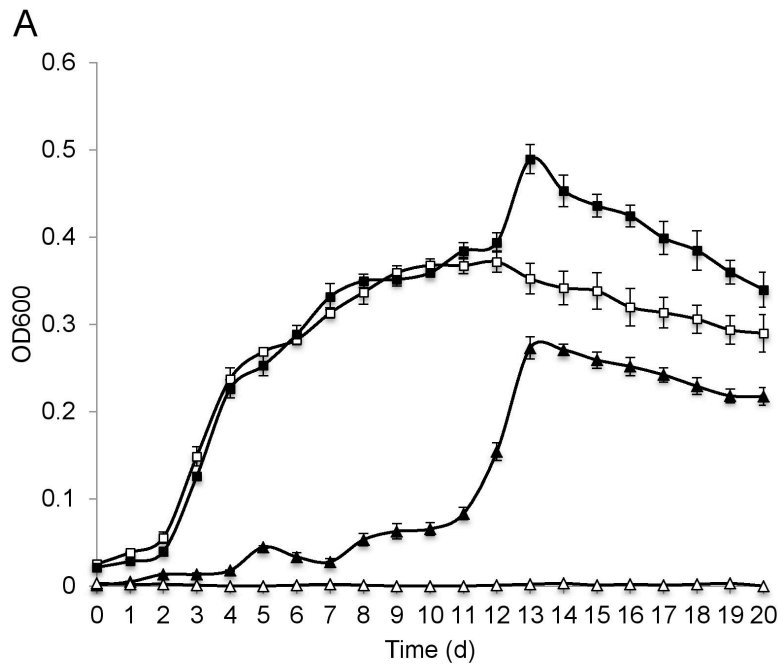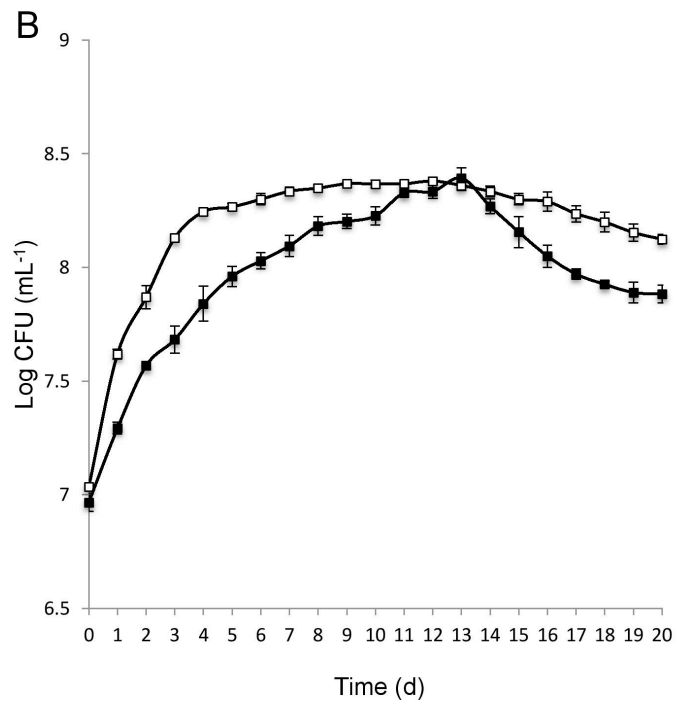

**Figure S4. Quorum sensing of *Hrr. lacusprofundi* associated with biofilm cells.**

N-acyl homoserine lactone-like quorum sensing was assessed using the supernatant fraction of planktonic cells (4 d growth) or biofilms (14 d growth), as for Fig. 6, and fluorescence microscopy images were recorded. Uninoculated medium B was used as negative control. The scale bar represents 100  $\mu\text{m}$ .

Figure S4

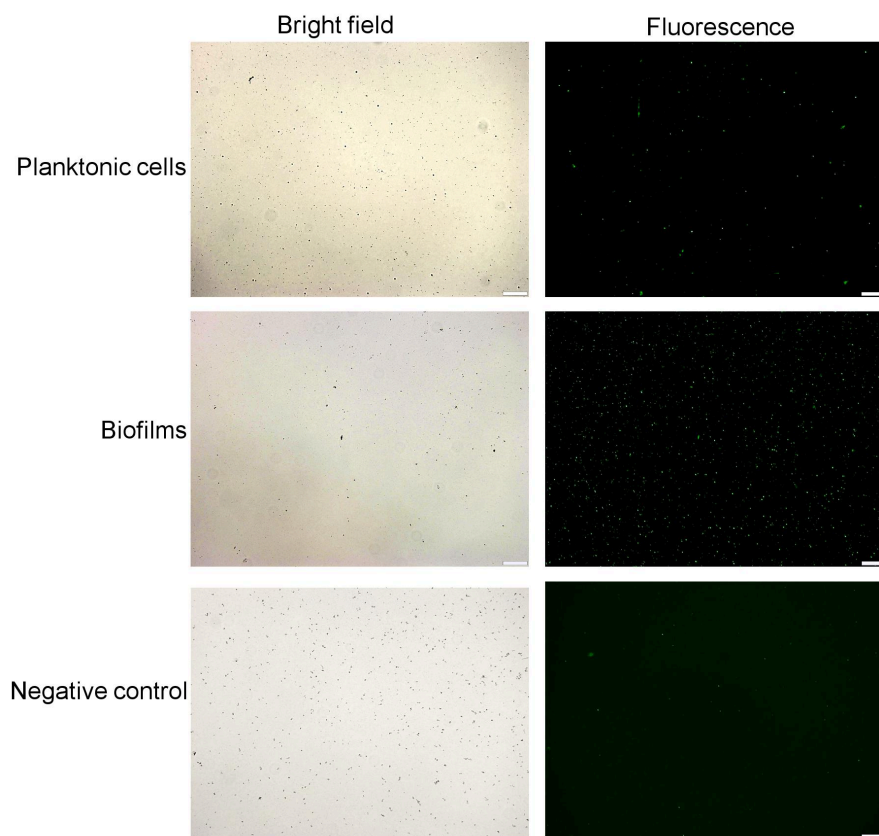

**Figure S5. Protein sequence and domain similarity of *Hrr. lacusprofundi* Hlac\_1867 and other archaeal and bacterial DNA metabolism proteins.**

A: Hlac\_1867 (ACM57445.1) compared to *Hfx. volcanii* Hvo\_1477

(WP\_004043458.1) and *Halobacterium* sp. NRC-1 ComA (WP\_010904188.1).

B: Hlac\_1867 compared to *B. subtilis* ComEC (WP\_009967776.1) and *N.*

*gonorrhoeae* ComA (KLR91205.1). A and B: Percent amino acid sequence identity

determined by BLAST (grey with amino acid numbers and % identity); Domain

structures: COGs protein domains and protein superfamilies identified using the

MicrobesOnLine portal<sup>2</sup>; Lipobox motif (lipo) predicted by searching against interPro

platform; Helix-turn-helix motifs (HTH) predicted using GYM 2.0

(<http://users.cis.fiu.edu/~giri/bioinf/GYM2/welcome.html>)<sup>3</sup>.

Figure S5

A.

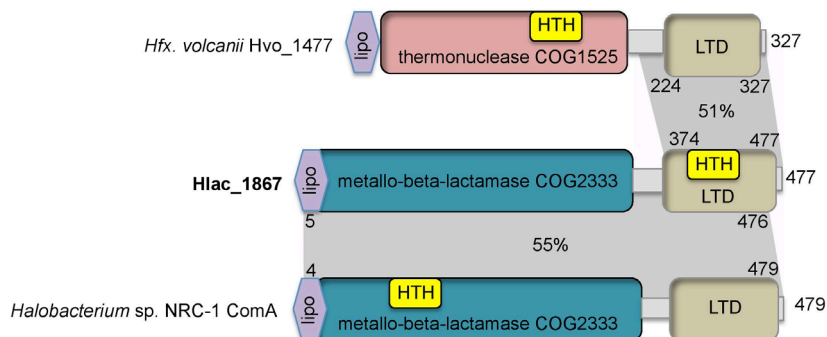

B.

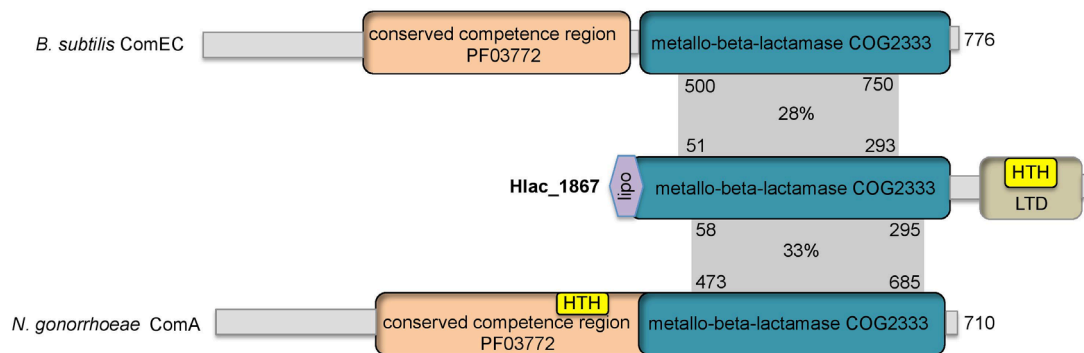



**Figure S6. Statistical analyses of iTRAQ data from repeat experiments.**

The proteins derived from the whole cell fraction in one labelling experiment that were differentially abundant (stationary vs log phase in medium B) were used for statistical analyses to assess reproducibility. The statistical analyses between biological replicates (A), technical replicates (B) and 8-plex iTRAQ labelling experiment replicates (C) were performed using SPSS 22.0. Unpaired data were removed. The linear relationship between biological replicates, technical replicates and experiment replicates was determined by examining the Analysis of Variance. The F-test outcome is highly statistically significant at a level of less than 0.001, suggesting a linear relationship among the variables. A: The Pearson correlation coefficient was 0.956 for the biological replicates and the correlation was significant at the 0.01 level (2-tailed). The regression equation for the biological replicates was  $y=0.09+0.86x$  ( $R^2=0.914$ ). B: The Pearson correlation coefficient was 0.825 for the technical replicates and the correlation was significant at the 0.01 level (2-tailed). The regression equation for the biological replicates was  $y=0.19+0.86x$  ( $R^2=0.681$ ). C: The Pearson correlation coefficient was 0.709 for the experiment replicates and the correlation was significant at the 0.01 level (2-tailed). The regression equation for the biological replicates was  $y=-0.25+1.5x$  ( $R^2=0.503$ ).

Figure S6

A.

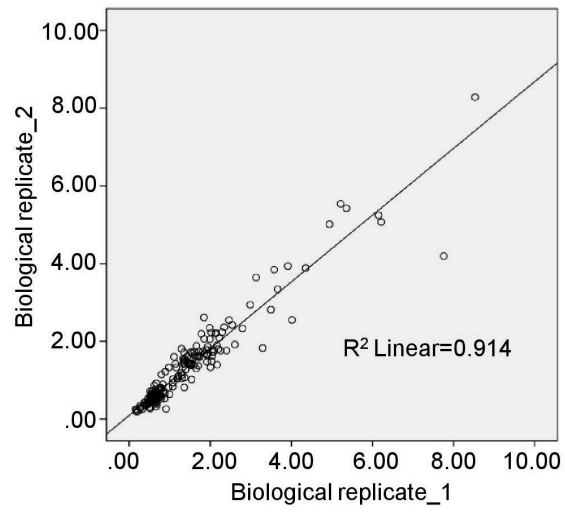

B.

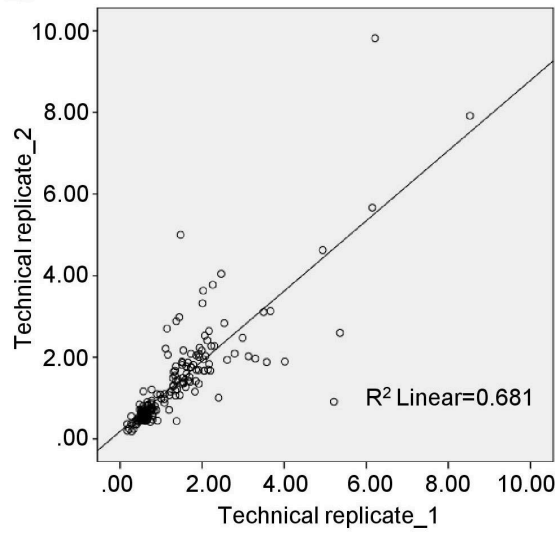

C.

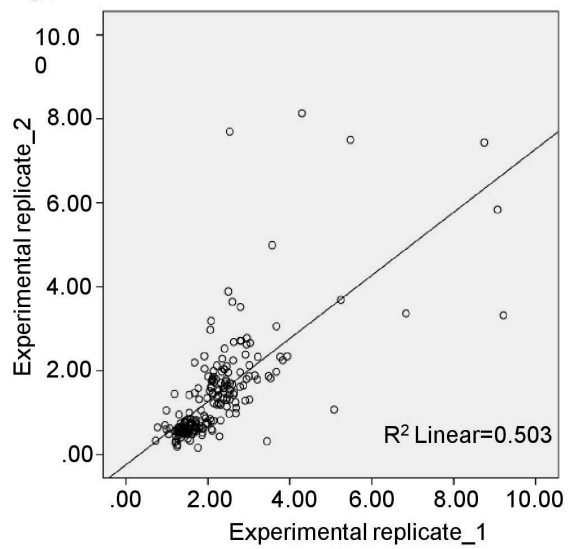

**Table S1. Labelling design for samples using the iTRAQ 8-plex format**

| <b>iTRAQ reporter ion</b> | <b>Growth medium</b> | <b>Growth phase</b> | <b>Cell phenotype</b> |
|---------------------------|----------------------|---------------------|-----------------------|
| 113                       | Medium A             | log                 | planktonic            |
| 114                       | Medium A             | log                 | planktonic            |
| 115                       | Medium A             | stationary          | planktonic            |
| 116                       | Medium A             | stationary          | planktonic            |
| 117                       | Medium B             | log                 | planktonic            |
| 118                       | Medium B             | log                 | planktonic            |
| 119                       | Medium B             | stationary          | biofilm               |
| 121                       | Medium B             | stationary          | biofilm               |
